# Supplementary material
Source: MDPI journal article supplement (https://www.mdpi.com/1099-4300/20/4/240)
Supplement: s1 [file s1]

## R code for $I_{\text{dep}}$ and $I_{\text{mmi}}$ PIDs for Gaussian systems

These notes describe how to use the package R to compute PIDs for Gaussian systems<sup>1</sup>. The output for the numerical examples in the paper was produced using version 3.4.3 of R, which can be downloaded from <http://cran.r-project.org>.

A script for running Examples 5 and 6 is available in the folder `ldepFuns`, in the file, `ldepGscript.txt`. Once R is loaded, the user is required to set a working directory and then to load the functions that are contained in the file, `ldepGaussR.txt`.

Commands given in `ldepGscript.txt` can then be run by copying and pasting them into R and running them. Data used in examples 5 & 6 in the paper are provided in this file and .

The folder `ldepFuns` contains the definitions of four functions, given as follows

| Function              | Inputs          | Outputs                                                   |
|-----------------------|-----------------|-----------------------------------------------------------|
| <code>ldepGU</code>   | $p, q, r$       | $I_{\text{dep}}$ and $I_{\text{mmi}}$ PIDs (univariate)   |
| <code>ldepGM</code>   | sizes, mat      | $I_{\text{dep}}$ and $I_{\text{mmi}}$ PIDs (multivariate) |
| <code>DevTestU</code> | $p, q, r, n$    | Model names and p-values                                  |
| <code>DevTestM</code> | sizes, mat, $n$ | Model names and p-values                                  |

where

- $p$  is the correlation between  $X_0$  and  $X_1$
- $q$  is the correlation between  $X_0$  and  $Y$
- $r$  is the correlation between  $X_1$  and  $Y$
- $n$  is the number of observations (sample size)
- sizes is a numeric list of the values  $n_0, n_1, n_2$
- mat is a positive definite covariance or correlation matrix

---

<sup>1</sup>Kay & Ince (2018): Exact partial information decompositions for Gaussian systems based on dependency constraints (*submitted*)
